# Supplementary material
Source: Elsevier journal article supplement (https://git.physik.uzh.ch/gitbucket/mchrzasz/Lecture_repo/raw/5545126dca7616e4a1b02cd5dd35bfe8a3872f68/Lectures_others/MC/W_Placzek_2010/mmc09.pdf)
Supplement: mmc09 [file mmc09.pdf]

# Odwracanie macierzy oraz rozwiązywanie równań różniczkowych cząstkowych metodami błędzenia przypadkowego

- **Odwracanie macierzy.**
  - ▷ **Metoda podstawowa.**
  - ▷ **Metoda dualna.**
- **Równania różniczkowe cząstkowe.**
  - ▷ **Wprowadzenie.**
  - ▷ **Równanie Laplace'a – zagadnienie Dirichleta.**
  - ▷ **Równania paraboliczne.**

- Metody rozwiązywania układów równań liniowych można zastosować do odwracania macierzy.

- ▶ Kolejne kolumny macierzy odwrotnej można znaleźć rozwiązując kolejno układy równań:

$$\mathbf{A}\vec{x} = \hat{\mathbf{e}}_i, \quad i = 1, 2, \dots, n,$$

gdzie  $\hat{\mathbf{e}}_i$  jest  $i$ -tym wersorem.

- ¶ **Dygresja:** Metoda von Neumanna–Ulama została początkowo opublikowana jako metoda odwracania macierzy.

- ▶ W celu odwrócenia macierzy  $\mathbf{A}$ , dobieramy macierz pomocniczą  $\mathbf{M}$  tak, aby macierz:

$$\mathbf{H} = \mathbf{I} - \mathbf{M}\mathbf{A},$$

spełniała warunek normalizacji:

$$\|\mathbf{H}\| \equiv \max_{1 \leq i \leq n} \sum_{j=1}^n |h_{ij}| < 1,$$

gdzie  $\mathbf{I}$  – macierz jednostkowa.

- ▷ Następnie macierz  $(\mathbf{M}\mathbf{A})^{-1}$  rozwijamy w szereg:

$$(\mathbf{M}\mathbf{A})^{-1} = (\mathbf{I} - \mathbf{H})^{-1} = \mathbf{I} + \mathbf{H} + \mathbf{H}^2 + \dots + \mathbf{H}^k + \dots \quad (1)$$

- ▶ Macierz odwrotną  $\mathbf{A}^{-1}$  otrzymujemy ze wzoru:

$$\mathbf{A}^{-1} = \mathbf{A}^{-1}\mathbf{M}^{-1}\mathbf{M} = (\mathbf{M}\mathbf{A})^{-1}\mathbf{M}.$$

▷ Dla  $(i, j)$ -ego elementu macierzy  $(\mathbf{MA})^{-1}$  mamy:

$$\begin{aligned}
 (\mathbf{MA})^{-1}_{ij} = & \delta_{ij} + h_{ij} + \sum_{i_1=1}^n h_{ii_1} h_{i_1,j} + \sum_{i_1=1}^n \sum_{i_2=1}^n h_{ii_1} h_{i_1 i_2} h_{i_2 j} + \dots \\
 & + \sum_{i_1=1}^n \sum_{i_2=1}^n \dots \sum_{i_k=1}^n h_{ii_1} h_{i_1 i_2} \dots h_{i_{k-1} i_k} h_{i_k j} + \dots,
 \end{aligned} \tag{2}$$

gdzie  $\delta_{ij}$  – delta Kroneckera.

## Schemat:

Wybieramy (dowolnie) macierz przejść  $P = (p_{ij})$  o następujących własnościach:

$$p_{ij} \geq 0, \quad p_{ij} = 0 \text{ gdy } h_{ij} = 0, \quad p_{i0} = 1 - \sum_{j=1}^n p_{ij} > 0.$$

► **Konstruujemy** błądzenie przypadkowe punktu  $X$  po zbiorze indeksów  $\{0, 1, \dots, n\}$ :

1. W chwili początkowej ( $t = 0$ ) punkt  $X$  umieszczamy w stanie  $i_0 = i$ .
2. Jeżeli w chwili  $t$  punkt  $X$  znajduje się w stanie  $i_t$  ( $i_t \neq 0$ ), to w chwili  $(t + 1)$  znajdzie się w stanie  $i_{t+1}$  z prawdopodobieństwem  $p_{i_t, i_{t+1}}$ .
3. Błądzenie zostaje **zakończony**, gdy punkt  $X$  znajdzie się w stanie 0.

4. Zaobserwowanej trajektorii  $\gamma_k = (i_0 = i, i_1, \dots, i_k, 0)$  punktu  $X$  przypisujemy wartość:

$$X(\gamma_k) = \frac{h_{ii_1} h_{i_1 i_2} \dots h_{i_{k-1} i_k}}{p_{ii_1} p_{i_1 i_2} \dots p_{i_{k-1} i_k}} \frac{\delta_{i_k j}}{p_{i_k 0}}. \quad (3)$$

Kroki 1–4 powtarzamy  $N$  razy.

► Średnia arytmetyczna zaobserwowanych wartości  $X(\gamma_k)$  jest estymatorem nieobciążonym elementu  $(\mathbf{MA})^{-1}_{ij}$ .

Dowód:

Ponieważ prawdopodobieństwo zaobserwowania trajektorii  $\gamma_k$  wynosi:

$$P(\gamma_k) = p_{ii_1} p_{i_1 i_2} \dots p_{i_{k-1} i_k} p_{i_k 0},$$

więc podobnie jak dla uogólnionej metody podstawowej von Neumanna–Ulama dla rozwiązywania układów równań liniowych dowodzi się, że:

$$E\{X(\gamma_k)\} = (\mathbf{MA})^{-1}_{ij}. \quad \boxtimes$$

► Innym estymatorem nieobciążonym elementu  $(\mathbf{MA})^{-1}_{ij}$  jest **estymator Wasowa**:

$$X^*(\gamma_k) = \sum_{m=0}^k \frac{h_{ii_1} h_{i_1 i_2} \dots h_{i_{m-1} i_m}}{p_{ii_1} p_{i_1 i_2} \dots p_{i_{m-1} i_m}} \delta_{i_m j}. \quad (4)$$

- Na zbiorze indeksów  $\{0, 1, \dots, n\}$  określamy (dowolnie) rozkład prawdopodobieństwa:

$$q_1, q_2, \dots, q_n, \text{ tzn. } q_i > 0, i = 1, 2, \dots, n \text{ oraz } \sum_{i=1}^n q_i = 1.$$

- Ustalamy (dowolnie) macierz  $P$  prawdopodobieństw przejść w procesie błądzenia przypadkowego punktu  $X$  – jak w metodzie podstawowej.

1. Stan początkowy  $i_0$  wędrującego punktu  $X$  losujemy według rozkładu  $q_i: \mathcal{P}\{i_0 = i\} = q_i$ .
2. Jeżeli w chwili  $t$  punkt  $X$  znajduje się w stanie  $i_t$  ( $i_t \neq 0$ ), to z prawdopodobieństwem  $p_{i_t, i_{t+1}}$  w chwili  $(t + 1)$  znajdzie się w stanie  $i_{t+1}$ .
3. Błądzenie kończy się z chwilą osiągnięcia przez punkt  $X$  stanu 0.
4. Trajektorii  $\gamma = (i_0, i_1, \dots, i_k, 0)$ ,  $i_j \neq 0$  dla  $0 \leq j \leq k$ , przypisujemy macierz:

$$\mathbf{Y}(\gamma) = \frac{h_{i_1 i_0} h_{i_2 i_1} \dots h_{i_k, i_{k-1}}}{p_{i_0 i_1} p_{i_1 i_2} \dots p_{i_{k-1} i_k}} \frac{1}{q_{i_0} p_{i_k 0}} \mathbf{e}_{i_k i_0} \in \mathbb{R}^n \times \mathbb{R}^n,$$

gdzie  $\mathbf{e}_{ij}$  – macierz, której  $(i, j)$ -ty element = 1, a pozostałe = 0.

Kroki 1–4 powtarzamy  $N$  razy.

► Średnia arytmetyczna zaobserwowanych macierzy  $\mathbf{Y}(\gamma)$  jest estymatorem nieobciążonym macierzy odwrotnej  $(\mathbf{MA})^{-1}$ .

▷ Estymator Wasowa:

$$\mathbf{Y}^*(\gamma) = \sum_{m=0}^k \frac{h_{i_1 i_0} h_{i_2 i_1} \dots h_{i_m, i_{m-1}}}{q_{i_0} p_{i_0 i_1} p_{i_1 i_2} \dots p_{i_{m-1} i_m}} \mathbf{e}_{i_m i_0} \in \mathbb{R}^n \times \mathbb{R}^n,$$

## ► PRZYKŁAD:

Rozważmy błądzenie przypadkowe cząsteczki  $X$  po osi liczb rzeczywistych:

- W chwili  $t = 0$  cząsteczka znajduje się w początku układu współrzędnych, tzn. w punkcie  $x = 0$ .
- Jeżeli w chwili  $t$  cząsteczka znajduje się w punkcie  $x$ , to w chwili  $(t + 1)$  znajdzie się w punkcie  $(x + 1)$  z prawdopodobieństwem  $p$  (dane) lub w punkcie  $(x - 1)$  z prawdopodobieństwem  $q = 1 - p$ .
- Poszczególne ruchy cząsteczki są niezależne.

▷ **Zadanie:** Opisać ruch cząsteczki, tzn. znaleźć funkcję, która podaje jej położenie w dowolnej chwili czasu  $t > 0$ .

Cząsteczka wykonuje ruchy przypadkowe → zagadnienie probabilistyczne:

Ozn.  $v(x, t)$  – prawdopodobieństwo, że w chwili czasu  $t$  cząsteczka  $X$  znajdzie się w punkcie  $x$ .

Dla funkcji  $v(x, t)$  otrzymujemy następujące równanie:

$$v(x, t + 1) = p v(x - 1, t) + q v(x + 1, t),$$

z warunkami początkowymi:

$$v(0, 0) = 1, \quad v(x, 0) = 0 \text{ dla } x \neq 0.$$

⇒ Funkcja  $v(x, t)$  jest w pełni określona dla wszystkich  $x$  oraz  $t$ .

Np. dla  $t = 1$  mamy:  $v(x, 1) = p v(x - 1, 0) + q v(x + 1, 0)$ .

Niech cząsteczka wykonuje kroki o długości  $\Delta x$  w chwilach  $k\Delta t$ ,  $k = 1, 2, \dots$ :

$$v(x, t + \Delta t) = p v(x - \Delta x, t) + q v(x + \Delta x, t).$$

Rozwijając funkcję  $v(x, t)$  w szereg Taylora do wyrazów liniowych w  $\Delta t$  i kwadratowych w  $\Delta x$  otrzymujemy:

$$\begin{aligned} v(x, t) + \frac{\partial v(x, t)}{\partial t} \Delta t &= p v(x, t) - p \frac{\partial v(x, t)}{\partial x} \Delta x + \frac{1}{2} p \frac{\partial^2 v(x, t)}{\partial x^2} (\Delta x)^2 \\ &+ q v(x, t) + q \frac{\partial v(x, t)}{\partial x} \Delta x + \frac{1}{2} q \frac{\partial^2 v(x, t)}{\partial x^2} (\Delta x)^2, \end{aligned}$$

skąd mamy:

$$\frac{\partial v(x, t)}{\partial t} \Delta t = -(p - q) \frac{\partial v(x, t)}{\partial x} \Delta x + \frac{1}{2} \frac{\partial^2 v(x, t)}{\partial x^2} (\Delta x)^2.$$

Dzieląc obie strony równania przez  $\Delta t$  i przechodząc do granicy  $\Delta t \rightarrow 0$ , tak aby:

$$(p - q) \frac{\Delta x}{\Delta t} \rightarrow 2c, \quad \frac{(\Delta x)^2}{\Delta t} \rightarrow 2D,$$

otrzymujemy **równanie Fokkera–Plancka** dla dyfuzji z prądem:

$$\frac{\partial v(x, t)}{\partial t} = -2c \frac{\partial v(x, t)}{\partial x} + D \frac{\partial^2 v(x, t)}{\partial x^2},$$

gdzie  $D$  jest współczynnikiem dyfuzji, a  $c$  prędkością prądu (dla  $c = 0$  błędzenie jest symetryczne).

- ▷ Przedstawiony przykład sugeruje sposób rozwiązywania równań różniczkowych cząstkowych (przynajmniej pewnej klasy) metodami błędzenia przypadkowego (łańcuchów Markowa).
- ▶ Teraz rozważymy pewne klasy równań różniczkowych i spróbujemy sformułować dla nich problemy probabilistyczne w postaci łańcuchów Markowa (błędzenia przypadkowego), których rozwiązania są identyczne z rozwiązaniami tych równań.

## Równanie Laplace'a

$$\frac{\partial^2 u}{\partial x_1^2} + \frac{\partial^2 u}{\partial x_2^2} + \dots + \frac{\partial^2 u}{\partial x_k^2} = 0, \quad (x_1, x_2, \dots, x_k) \in D \subset \mathbb{R}^k. \quad (5)$$

Funkcja  $u(x_1, x_2, \dots, x_k)$  spełniająca to równanie nazywa się **funkcją harmoniczną** (jest ciągła wraz z pierwszą i drugą pochodną). Jeżeli znane są wartości funkcji harmonicznego na brzegu  $\Gamma(D)$  obszaru  $D$ , to są określone we wszystkich punktach wewnątrz tego obszaru.

- **Zagadnienie Dirichleta:**

Znaleźć wartości funkcji harmonicznego  $u(x_1, x_2, \dots, x_k)$  wewnątrz obszaru  $D$ , jeżeli na brzegu  $\Gamma(D)$  tego obszaru przyjmuje ona wartości dane pewną funkcją  $f$ :

$$u(x_1, x_2, \dots, x_k) = f(x_1, x_2, \dots, x_k), \quad (x_1, x_2, \dots, x_k) \in \Gamma(D). \quad (6)$$

- ▷ Dalej będziemy rozważać przypadek  $k = 2$ , który łatwo jest uogólnić na dowolne  $k$ .



► Będziemy rozważać zagadnienie Dirichleta w formie dyskretnej:

- Obszar  $D$  pokrywamy siatką o kwadratowych oczkach o długości  $h$ .
- Pewne punkty traktujemy jako **punkty wewnętrzne** (zaznaczone na rysunku **kółkami**) – ich zbiór oznaczamy przez  $D^*$ .
- Inne punkty traktujemy jako **punkty brzegowe** (zaznaczone na rysunku **gwiazdkami**) – ich zbiór oznaczamy przez  $\Gamma(D^*)$ .

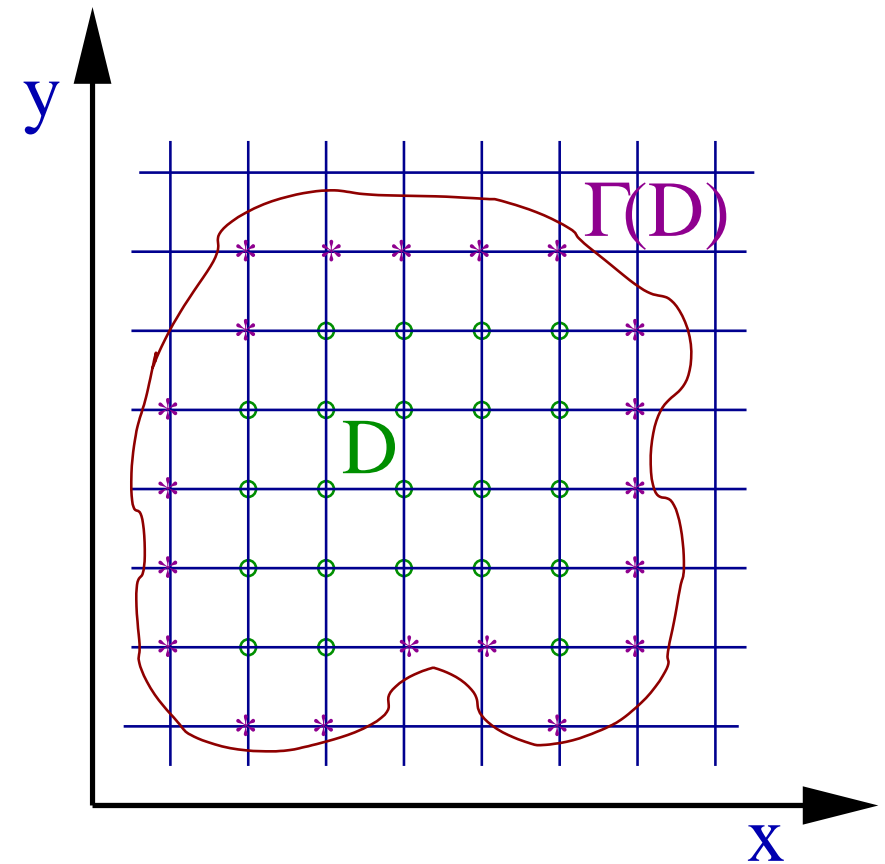

▷ Drugie pochodne funkcji  $u$  zamieniamy na przyrosty:

$$\frac{\frac{u(x+h)-u(x)}{h} - \frac{u(x)-u(x-h)}{h}}{h} = \frac{u(x+h) - 2u(x) + u(x-h)}{h^2}$$

i wybieramy jednostki tak, że  $h = 1$ .

⇒ Zagadnienie Dirichleta w formie dyskretnej:

Znaleźć funkcję  $u^*$ , która spełnia równanie różnicowe:

$$u^*(x, y) = \frac{1}{4} [u^*(x - 1, y) + u^*(x + 1, y) + u^*(x, y - 1) + u^*(x, y + 1)] \quad (7)$$

w punktach  $(x, y) \in D^*$  przy warunkach:

$$u^*(x, y) = f^*(x, y), \quad (x, y) \in \Gamma(D^*), \quad (8)$$

gdzie  $f^*$  jest dyskretnym odpowiednikiem funkcji  $f$ .

► Rozważmy błądzenie przypadkowe cząsteczki  $X$  po siatce  $D^* \cup \Gamma(D^*)$ :

- W chwili  $t = 0$  cząsteczka  $X$  znajduje się w pewnym punkcie początkowym  $(\xi, \eta) \in D^*$ .
- Jeżeli w chwili  $t$  cząsteczka znajduje się w punkcie  $(x, y)$ , to w chwili  $(t + 1)$  znajdzie się z jednakowym prawdopodobieństwem w jednym z czterech sąsiednich punktów:  $(x - 1, y)$ ,  $(x + 1, y)$ ,  $(x, y - 1)$  lub  $(x, y + 1)$ .
- Jeżeli cząsteczka  $X$  w pewnej chwili znajdzie się na brzegu  $\Gamma(D^*)$ , to **kończy** swój ruch.
- Każdej trajektorii cząsteczki  $X$  startującej z punktu  $(\xi, \eta)$  przypisujemy wartość zmiennej losowej:  $v(\xi, \eta) = f^*(x, y)$ , gdzie  $(x, y) \in \Gamma(D^*)$ .

Niech:  $p_{\xi,\eta}(x, y)$  – prawdopodobieństwo tego, że cząsteczka  $X$  startująca z punktu  $(\xi, \eta)$  skończy swoje błądzenie w punkcie  $(x, y)$ .

▷ **Możliwości:**

1. Punkt  $(\xi, \eta) \in \Gamma(D^*)$ , tzn. jest punktem **brzegowym** – wówczas:

$$p_{\xi,\eta}(x, y) = \begin{cases} 1, & (x, y) = (\xi, \eta), \\ 0, & (x, y) \neq (\xi, \eta) \end{cases} \quad (9)$$

2. Punkt  $(\xi, \eta) \in D^*$ , tzn. jest punktem **wewnętrznym** – wówczas:

$$p_{\xi,\eta}(x, y) = \frac{1}{4} [p_{\xi-1,\eta}(x, y) + p_{\xi+1,\eta}(x, y) + p_{\xi,\eta-1}(x, y) + p_{\xi,\eta+1}(x, y)], \quad (10)$$

dlatego że cząsteczka startująca z tego punktu może dojść do punktu  $(x, y)$  tylko przez jeden z sąsiednich punktów:  $(x - 1, y)$ ,  $(x + 1, y)$ ,  $(x, y - 1)$  lub  $(x, y + 1)$ , których wybór jest jednakowo prawdopodobny.

► Wartość oczekiwana zmiennej losowej  $v(\xi, \eta)$  jest dana przez:

$$E(\xi, \eta) = \sum_{(x,y) \in \Gamma^*} p_{\xi,\eta}(x, y) f^*(x, y), \quad (11)$$

gdzie sumowanie przebiega po wszystkich punktach brzegowych.

Mnożąc równanie (10) przez  $f^*(x, y)$  i sumując po wszystkich punktach brzegowych  $(x, y)$ :

$$E(\xi, \eta) = \frac{1}{4} [E(\xi - 1, \eta) + E(\xi + 1, \eta) + E(\xi, \eta - 1) + E(\xi, \eta + 1)]. \quad (12)$$

Natomiast podstawiając wyrażenie (9) do wzoru (11) otrzymujemy:

$$E(\xi, \eta) = f^*(\xi, \eta), \quad (\xi, \eta) \in \Gamma(D^*). \quad (13)$$

▷ Zatem wartość oczekiwana spełnia identyczne równania co funkcja  $u^*(x, y)$ .

► Z jednoznaczności rozwiązania zagadnienia Dirichleta dla równania Laplace'a wynika, że:

$$E(x, y) \equiv u^*(x, y).$$

**Schemat szacowania**  $u^*(x, y)$ ,  $(x, y) \in D^*$ :

1. Cząsteczkę  $X$  umieszczamy w punkcie  $(x, y)$ .
2. Obserwujemy błądzenie tej cząsteczki do momentu, w którym osiągnie ona brzeg  $\Gamma(D^*)$ .
3. Obliczamy wartość funkcji  $f^*$  w punkcie brzegowym, do którego cząsteczka  $X$  dotarła.

Kroki 1–3 powtarzamy  $N$  razy.

→ Oszacowaniem wartości funkcji  $u^*$  w punkcie  $(x, y)$  jest średnia arytmetyczna zaobserwowanych wartości funkcji  $f^*$ .

▷ Można pokazać, że oczekiwany czas błądzenia da się oszacować z góry przez wielkość niezależną od liczby zmiennych – ważne dla wielu wymiarów!

Funkcja  $u(x, y)$  spełnia równanie Laplace'a na kwadracie  $0 \leq x, y \leq 4$  z warunkami brzegowymi:

$$u(x, 0) = 0, \quad u(4, y) = y, \quad u(x, 4) = x, \quad u(0, y) = 0. \quad (14)$$

► Znaleźć wartość tej funkcji w punkcie  $(2, 2)$ .

→ Rozwiązanie dokładne:  $u(x, y) = xy/4$ , tzn.  $u(2, 2) = 1$ .

### Rozwiązanie metodą błędzenia przypadkowego:

- Zamieniamy zagadnienie ciągłe na zagadnienie dyskretne budując siatkę kwadratową o oczkach długości  $h = 1$ .
- Obserwujemy wszystkie trajektorie rozpoczynające się w punkcie  $(2, 2)$  i kończące się na brzegu kwadratu, przypisując im odpowiednie wartości brzegowe funkcji  $u$  dane wzorami (14).

▷ Przykładowe rozwiązanie dla 20 trajektorii:

$$u(2, 2) = 1.0 \pm 0.3351.$$

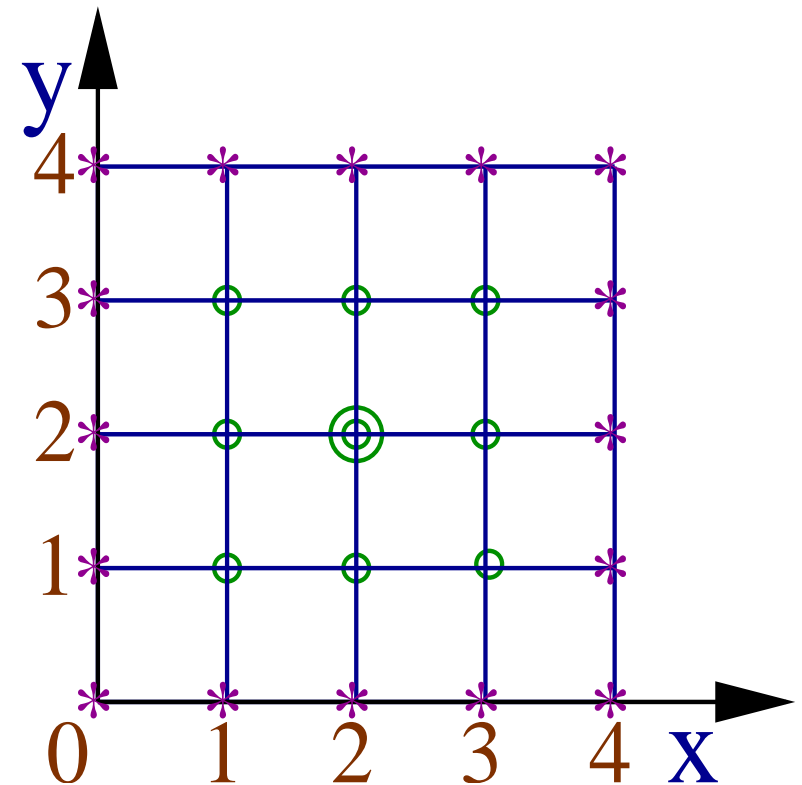

⇒ Ćw. N11.1: Rozwiązać powyższy problem metodą błędzenia przypadkowego.

**Zagadnienie:**

Znaleźć taką funkcję  $u(x_1, x_2, \dots, x_k, t)$ , która wewnątrz obszaru  $D \subset \mathbb{R}^k$  spełnia równanie paraboliczne:

$$\frac{\partial^2 u}{\partial x_1^2} + \frac{\partial^2 u}{\partial x_2^2} + \dots + \frac{\partial^2 u}{\partial x_k^2} = c \frac{\partial u}{\partial t} \quad (15)$$

z warunkami brzegowymi:

$$u(x_1, x_2, \dots, x_k, t) = g(x_1, x_2, \dots, x_k, t), \quad (x_1, x_2, \dots, x_k) \in \Gamma(D),$$

oraz warunkami początkowymi:

$$u(x_1, x_2, \dots, x_k, 0) = h(x_1, x_2, \dots, x_k), \quad (x_1, x_2, \dots, x_k) \in D.$$

- ▷ W ogólniejszym przypadku warunki te mogą zawierać również pochodne funkcji  $u$ .
- ▶ Podamy metodę rozwiązywania tych równań w oparciu o błędzenie przypadkowe.
  - Najpierw rozważymy przypadek jednowymiarowy.
  - Następnie podamy uogólnienie na dowolną liczbę wymiarów.

Znaleźć taką funkcję  $u(x, t)$ , która spełnia równanie różniczkowe:

$$\frac{\partial^2 u}{\partial x^2} = c \frac{\partial u}{\partial t}$$

przy warunkach brzegowych:

$$u(0, t) = f_1(t), \quad u(a, t) = f_2(t),$$

oraz warunkach początkowych:

$$u(x, 0) = g(x).$$

Zagadnienie to może być traktowane jako zadanie poszukiwania temperatury  $u(x, t)$  pręta jednorodnego w chwili  $t$  w punkcie odległym o  $x$  jednostek od początku pręta, jeżeli wiadomo, że rozkład początkowy temperatury jest określony przez funkcję  $g(x)$ , zaś zmiana temperatury na końcach  $x = 0$  oraz  $x = a$  dana jest funkcjami  $f_1(t)$  oraz  $f_2(t)$ .

► Dyskretyzujemy powyższy problem przyjmując:

$$x = k h, \quad \text{gdzie } h = \frac{a}{n}, \quad k = 1, \dots, n; \quad t = j l, \quad j = 0, 1, 2, \dots, \quad l - \text{stała.}$$

⇒ Równanie różnicowe:

$$\frac{u(x + h, t - l) - 2u(x, t - l) + u(x - h, t - l)}{h^2} = c \frac{u(x, t) - u(x, t - l)}{l}.$$

▷ Kroki  $h$  i  $l$  dobieramy tak, aby:  $ch^2 = 2l$ .

▶ Wówczas otrzymujemy równanie:

$$u(x, t) = \frac{1}{2} u(x + h, t - l) + \frac{1}{2} u(x - h, t - l).$$

→ Wartość funkcji  $u$  w punkcie  $x$  w chwili  $t$  może być oszacowana jako średnia arytmetyczna tej funkcji w punktach  $x + h$  i  $x - h$  w chwili poprzedniej.

**Schemat szacowania wartości funkcji  $u$  w chwili  $\tau$  w ustalonym punkcie  $\xi$ :**

1. Cząsteczkę  $X$  umieszczamy w punkcie  $\xi$  i przypisujemy jej wagę  $\tau$  równą współrzędnej czasowej tego punktu.
2. Jeżeli w pewnej chwili cząsteczka  $X$  znajduje się w punkcie  $x$  i jej współrzędna czasowa (waga) jest równa  $t$ , to w następnej chwili znajdzie się z prawdopodobieństwem  $\frac{1}{2}$  w punkcie  $x + h$  lub z prawdopodobieństwem  $\frac{1}{2}$  w punkcie  $x - h$ ; nowa waga cząsteczki będzie równa  $t - l$ .
3. Cząsteczka  $X$  kończy swoje błądzenie w jednej z dwóch sytuacji:
  - W pewnej chwili osiągnie punkt  $x = 0$  lub  $x = a$  – takiej trajektorii przypisujemy wartości odpowiednio  $f_1(t)$  lub  $f_2(t)$ , gdzie  $t$  jest aktualną wagą cząsteczki.
  - Współrzędna czasowa (waga) cząsteczki stanie się równa zero – takiej trajektorii przypisujemy wartość  $g(x)$ , gdzie  $x$  jest aktualną współrzędną przestrzenną cząsteczki.



Kroki 1–3 powtarzamy  $N$  razy.

→ Oszacowaniem wartości funkcji  $u$  w punkcie  $\xi$  w chwili  $\tau$  jest średnia arytmetyczna zaobserwowanych wartości przypisanych trajektoriom.

## Uwaga:

Zagadnienie jednowymiarowe może być rozpatrywane jako zagadnienie dwuwymiarowe w przestrzeni punktów  $(x, t)$  na nieograniczonym (w kierunku zmiennej  $t$ ) obszarze. Brzeg tego obszaru będzie osiągnięty po co najwyżej  $\tau/l$  krokach.

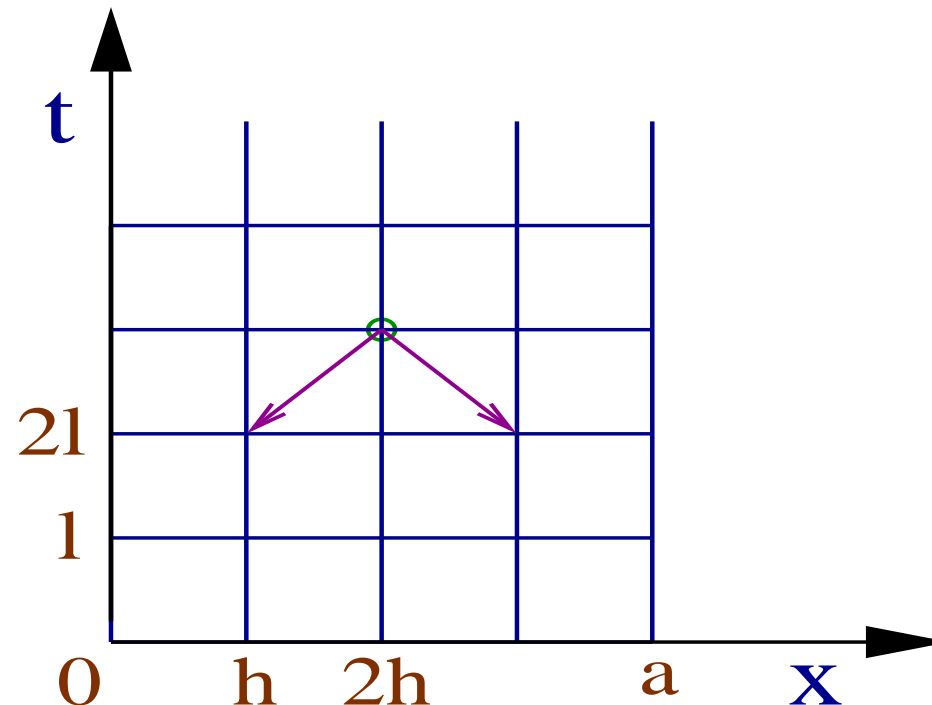

Uogólnienie na  $k$  wymiarów:

- Dobierając wielkości  $k$  oraz  $l$  tak, aby:

$$\frac{c h^2}{l} = 2k,$$

otrzymujemy:

$$u(x_1, x_2, \dots, x_k, t) =$$

$$\frac{1}{2k} \left[ u(x_1 + h, x_2, \dots, x_k, t - l) + u(x_1 - h, x_2, \dots, x_k, t - l) + \dots \right. \\ \left. + u(x_1, x_2, \dots, x_k + h, t - l) + u(x_1, x_2, \dots, x_k - h, t - l) \right].$$

- ▷ Problem  $k$ -wymiarowy możemy rozwiązać metodą błędzenia przypadkowego w nieograniczonym obszarze „czasoprzestrzeni”  $(k + 1)$ -wymiarowej punktów  $(x_1, x_2, \dots, x_k, t)$ .
- ▷ Postępujemy analogicznie jak w przypadku jednowymiarowym, z tym że teraz prawdopodobieństwo przejścia do jednego z sąsiadnich  $2k$  punktów wynosi  $\frac{1}{2k}$ .

⇒ **Ćw. N11.2:** Zaimplementować algorytm rozwiązywania jednowymiarowego równania parabolicznego metodą błędzenia przypadkowego i wykonać obliczenia dla wybranych warunków brzegowych i początkowych oraz stałych  $h$  i  $l$ .
